# Supplementary material
Source: PubMed Central journal article supplement (PMC4190512)
Supplement: supp_dyu048_dyu048-suppl_data.pdf [file supp_dyu048_dyu048-suppl_data.pdf]

Figure 3- Predicted Depression score before and after job loss according to household wealth among displaced workers aged 50 to 64 in the US and 13 European countries, HRS and SHARE

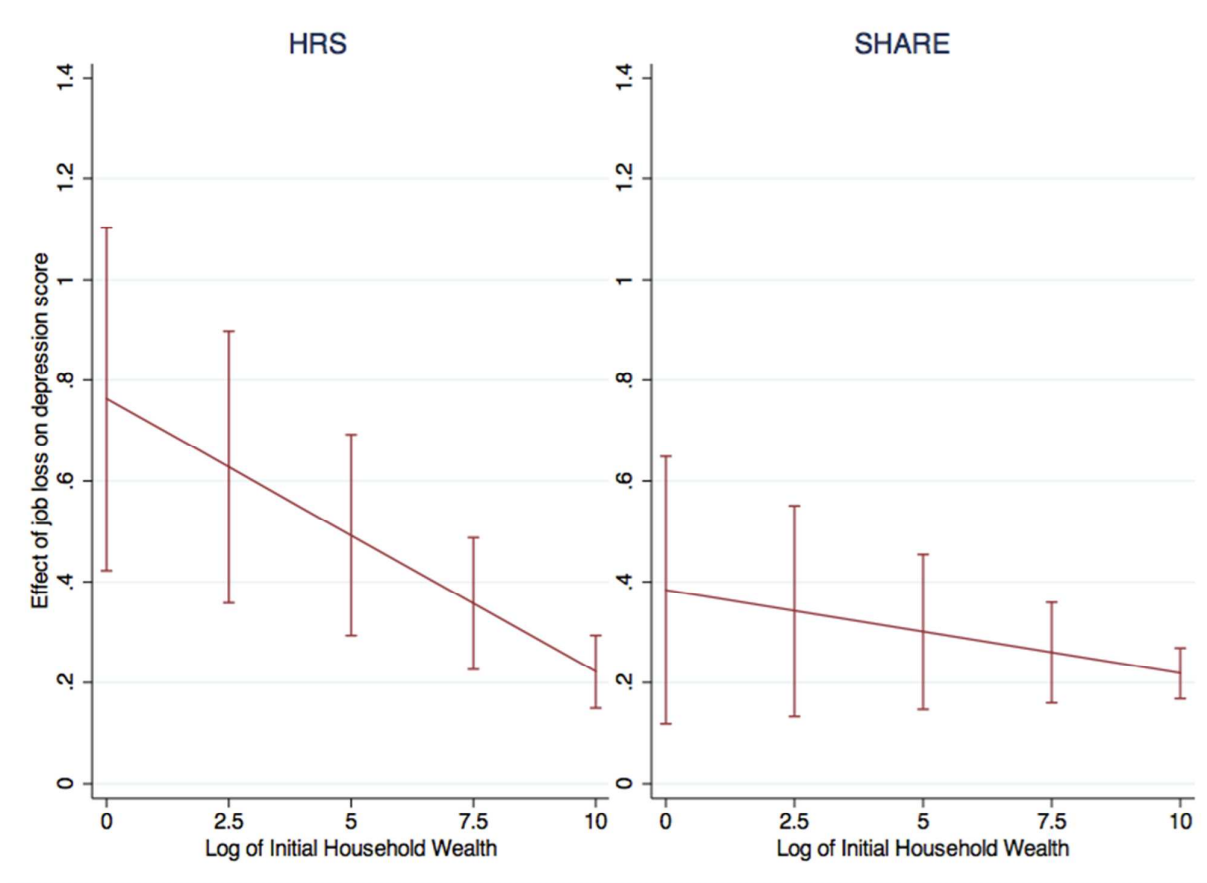

Higher values indicate more depressive symptoms; models additionally include country and interview year fixed effects Estimates are from a model that includes an interaction between unemployment and initial household income wealth; and controls for socio-demographics, wealth, income and physical health.

## Appendix

### Appendix 1- CES-D and Euro-D Questions

---

| <b>CES-D (HRS)</b>           | <b>Euro-D (SHARE)</b>                                                 |
|------------------------------|-----------------------------------------------------------------------|
| Time frame: Past week        | Time frame: Last month                                                |
| 1) You felt depressed?       | 1) Have you been sad or depressed?                                    |
| 2) Everything was an effort? | 2) What are your hopes for the future?                                |
| 3) Your sleep was restless?  | 3) Have you felt that you would rather be dead?                       |
| 4) You were happy?           | 4) Do you tend to blame yourself or feel guilty about anything?       |
| 5) You felt lonely?          | 5) For what do you blame yourself?                                    |
| 6) You enjoyed life?         | 6) Have you had trouble sleeping recently?                            |
| 7) You felt sad?             | 7) What is your interest in things?                                   |
| 8) You could not get going?  | 8) Do you keep up your interests?                                     |
|                              | 9) Have you been irritable recently?                                  |
|                              | 10) What has your appetite been like?                                 |
|                              | 11) Have you been eating more or less than usual?                     |
|                              | 12) Have you had too little energy to do the things you wanted to do? |
|                              | 13) How is your concentration?                                        |
|                              | 14) Can you concentrate on something you read?                        |
|                              | 15) What have you enjoyed doing recently?                             |
|                              | 16) Have you cried at all?                                            |

---

Appendix 2- Kernel density plot between normalized CES-D and Euro-D, SHARE

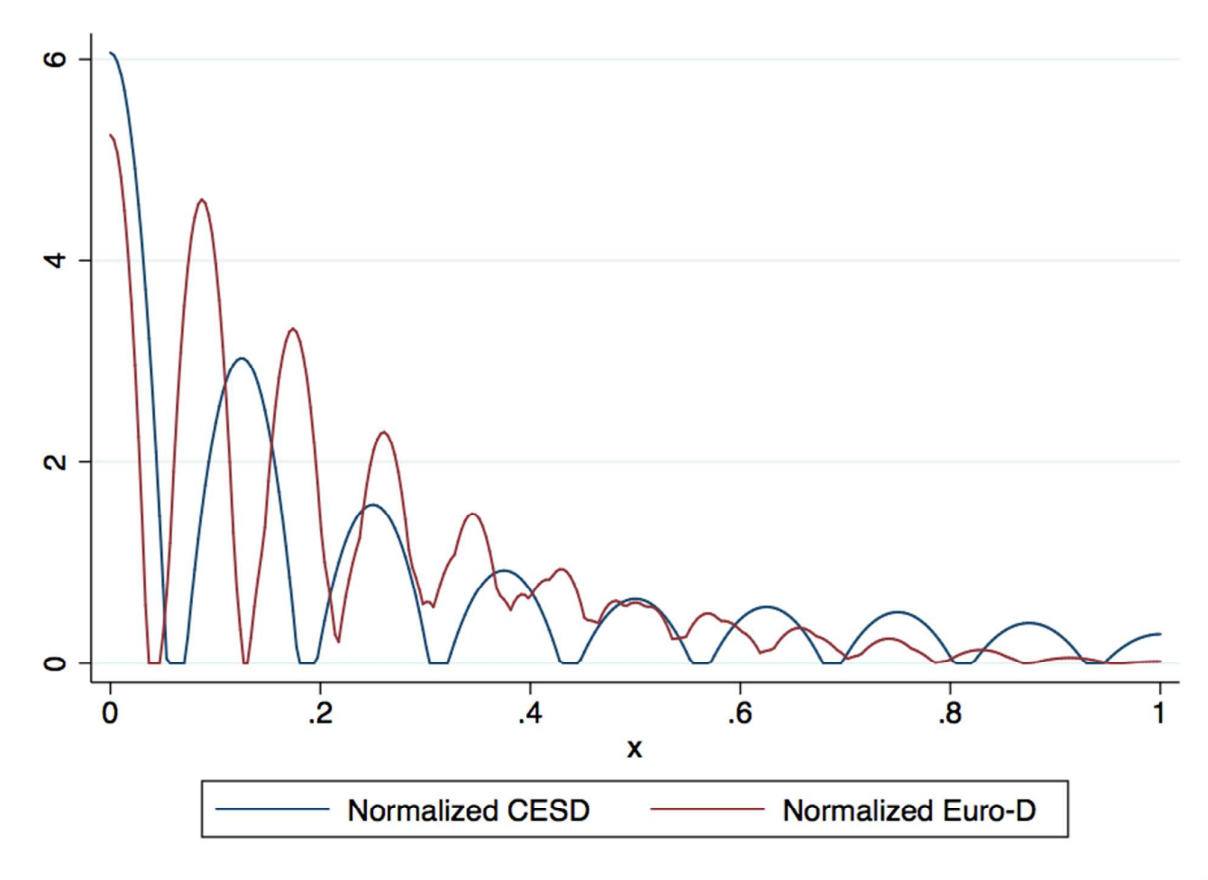

*Appendix 3-Testing heterogeneity in the effect of unemployment on depression between HRS and SHARE (higher values indicate more depressive symptoms) controlling for demographics, socioeconomics and functional status; initially employed individuals between 50-64, HRS and SHARE*

|                     | HRS and SHARE<br>Depression Score |
|---------------------|-----------------------------------|
| Share               | 0.01<br>[-0.022, 0.042]           |
| Unemployed          | 0.044***<br>[0.019,0.069]         |
| Unemployed*Share:   | 0.008<br>[-0.023,0.041]           |
| Retired             | -0.003<br>[-0.011,0.003]          |
| Disabled            | 0.101***<br>[0.079,0.123]         |
| Age                 | -0.001***<br>[-0.003, -0.001]     |
| Single              | 0.003<br>[-0.009,0.016]           |
| Divorced or Widowed | 0.042***<br>[0.035,0.050]         |
| Log Wealth          | -0.008***<br>[-0.010, -0.007]     |
| Pension             | -0.001<br>[-0.008,0.006]          |
| Log Income          | -0.004***<br>[-0.006, -0.002]     |
| Currently Smokes    | 0.014***<br>[0.008,0.020]         |
| Drinking            | 0.001<br>[-0.008,0.009]           |
| IADL Score          | 0.056***<br>[0.047,0.065]         |
| ADL Score           | 0.059***<br>[0.053,0.066]         |
| Observations        | 27221                             |
| R2                  |                                   |

95% confidence intervals in brackets  
 \*  $p < 0.05$ , \*\*  $p < 0.01$ , \*\*\*  $p < 0.001$

*Appendix 4- Heterogeneity test of wealth-unemployment interaction between US and Europe*

|                                  | HRS and SHARE                 |
|----------------------------------|-------------------------------|
|                                  | Depression Score              |
| Unemployed HRS                   | 0.648***<br>[0.310,0.986]     |
| Unemployed-Initial Wealth: HRS   | -0.054***<br>[-0.083, -0.025] |
| Unemployed: SHARE                | 0.211<br>[-0.049,0.472]       |
| Unemployed-Initial Wealth: SHARE | 0.038*<br>[0.001,0.075]       |
| Observations                     | 27221                         |
| R2                               | 0.023                         |

95% confidence intervals in brackets

\* p < 0.05, \*\* p < 0.01, \*\*\* p < 0.001

Estimates are from a model that includes an interaction between region (US or Europe) and unemployment status; region, unemployment status and region; and controls for socio-demographics, wealth, income and physical health.. Because the indicator variable for region is excluded, estimates in the table correspond to the effect of unemployment and the unemployment\*wealth interaction for each region.

Appendix 5- The impact of job loss on depression score, ages 50-64, complete sample, HRS and SHARE

|                     | HRS (I)<br>Depression Score | HRS (II)<br>Depression Score  | SHARE (I)<br>Depression Score   | SHARE (II)<br>Depression Score |
|---------------------|-----------------------------|-------------------------------|---------------------------------|--------------------------------|
| Unemployed          | 0.038**<br>[0.011,0.064]    | 0.037*<br>[0.0077,0.066]      | 0.029***<br>[0.018,0.041]       | 0.025**<br>[0.0073,0.042]      |
| Retired             | 0.0030<br>[-0.0064,0.012]   | -0.0028<br>[-0.013,0.0071]    | 0.00082<br>[-0.0053,0.0070]     | -0.0045<br>[-0.014,0.0053]     |
| Disabled            | 0.057***<br>[0.030,0.084]   | 0.049**<br>[0.015,0.083]      | 0.034***<br>[0.019,0.048]       | 0.041***<br>[0.019,0.063]      |
| Age                 | 0.0040<br>[-0.0041,0.012]   | 0.0039<br>[-0.0043,0.012]     | -0.0043***<br>[-0.0061,-0.0025] | -0.0029<br>[-0.0060,0.00011]   |
| Single              | 0.046<br>[-0.021,0.11]      | 0.043<br>[-0.020,0.11]        | 0.027<br>[-0.037,0.092]         | 0.093*<br>[0.0023,0.18]        |
| Divorced or Widowed | 0.061***<br>[0.042,0.079]   | 0.067***<br>[0.046,0.087]     | 0.054***<br>[0.032,0.075]       | 0.054***<br>[0.023,0.085]      |
| Log Wealth          |                             | -0.0053*<br>[-0.0095,-0.0011] |                                 | -0.00084<br>[-0.0036,0.0020]   |
| Pension             |                             | -0.011<br>[-0.023,0.0012]     |                                 | -0.0055<br>[-0.014,0.0034]     |
| Log Income          |                             | -0.00098<br>[-0.0056,0.0036]  |                                 | 0.00047<br>[-0.0024,0.0033]    |
| Currently Smokes    |                             | -0.011<br>[-0.031,0.0098]     |                                 | -0.013*<br>[-0.023,-0.0026]    |
| Drinking            |                             | 0.020<br>[-0.0029,0.043]      |                                 | 0.0085<br>[-0.00046,0.018]     |
| IADL Score          |                             | 0.035***<br>[0.023,0.048]     |                                 | 0.025**<br>[0.0060,0.044]      |
| ADL Score           |                             | 0.029***<br>[0.019,0.040]     |                                 | 0.028***<br>[0.016,0.039]      |
| Observations        | 20979                       | 18528                         | 35941                           | 22430                          |
| R <sup>2</sup>      | 0.011                       | 0.029                         | 0.008                           | 0.018                          |

95% confidence intervals in brackets

\*  $p < 0.05$ , \*\*  $p < 0.01$ , \*\*\*  $p < 0.001$

Appendix 6- Effect of Job loss on depressive feelings, restless sleep and life enjoyment, ages 50-64, HRS and SHARE

|                       | HRS I                   | HRS II                  | SHARE                   | SHARE                    |
|-----------------------|-------------------------|-------------------------|-------------------------|--------------------------|
| <b>Feel Depressed</b> |                         |                         |                         |                          |
| Unemployed            | 0.072*<br>[0.0081,0.14] | 0.055<br>[-0.012,0.12]  | 0.11***<br>[0.056,0.17] | 0.092*<br>[0.014,0.17]   |
| <b>Restless Sleep</b> |                         |                         |                         |                          |
| Unemployed            | 0.057<br>[-0.015,0.13]  | 0.052<br>[-0.025,0.13]  | 0.035<br>[-0.016,0.085] | 0.0065<br>[-0.068,0.081] |
| <b>Life Enjoyment</b> |                         |                         |                         |                          |
| Unemployed            | 0.029<br>[-0.020,0.078] | 0.030<br>[-0.025,0.085] | 0.013<br>[-0.024,0.050] | 0.013<br>[-0.037,0.064]  |
| Observations          | 13594                   | 12212                   | 23643                   | 15029                    |

95% confidence intervals in brackets

\*  $p < 0.05$ , \*\*  $p < 0.01$ , \*\*\*  $p < 0.001$

Higher values indicate worse mental health. Life enjoyment is an indicator whether the individual does not acknowledge enjoying her life; models include country fixed effect, survey year fixed effects, socio-demographics, wealth, income, and physical health measures

Appendix 7- The impact of job loss on depression score controlling for cognitive function, ages 50-64, baseline employed, HRS and SHARE

|                        | (1)<br>Depression Score        | (2)<br>Depression Score       | (3)<br>Depression Score         | (4)<br>Depression Score      |
|------------------------|--------------------------------|-------------------------------|---------------------------------|------------------------------|
| Unemployed             | 0.046**<br>[0.014,0.077]       | 0.035*<br>[0.0032,0.067]      | 0.036***<br>[0.017,0.055]       | 0.033*<br>[0.0045,0.062]     |
| Retired                | -0.0059<br>[-0.017,0.0054]     | -0.0095<br>[-0.021,0.0023]    | -0.00092<br>[-0.0081,0.0063]    | -0.0086<br>[-0.021,0.0035]   |
| Disabled               | 0.11***<br>[0.049,0.17]        | 0.055<br>[-0.017,0.13]        | 0.068***<br>[0.040,0.095]       | 0.068***<br>[0.028,0.11]     |
| Age                    | 0.0066<br>[-0.0031,0.016]      | 0.0068<br>[-0.0030,0.017]     | -0.0051***<br>[-0.0076,-0.0025] | -0.0018<br>[-0.0058,0.0021]  |
| Single                 | 0.051<br>[-0.028,0.13]         | 0.065<br>[-0.0076,0.14]       | 0.035<br>[-0.027,0.098]         | 0.078<br>[-0.018,0.17]       |
| Divorced or Widowed    | 0.063***<br>[0.038,0.089]      | 0.070***<br>[0.044,0.097]     | 0.040**<br>[0.014,0.066]        | 0.026<br>[-0.0083,0.061]     |
| Log Wealth             |                                | -0.0065*<br>[-0.012,-0.00098] |                                 | 0.00019<br>[-0.0033,0.0037]  |
| Pension                |                                | -0.012<br>[-0.029,0.0045]     |                                 | -0.0024<br>[-0.014,0.0091]   |
| Log Income             |                                | 0.0019<br>[-0.0041,0.0079]    |                                 | 0.0014<br>[-0.0022,0.0050]   |
| Currently Smokes       |                                | -0.00071<br>[-0.022,0.021]    |                                 | -0.0083<br>[-0.020,0.0036]   |
| Drinking               |                                | 0.016<br>[-0.013,0.044]       |                                 | 0.00041<br>[-0.011,0.011]    |
| IADL Score             |                                | 0.043***<br>[0.024,0.062]     |                                 | 0.014<br>[-0.011,0.039]      |
| ADL Score              |                                | 0.027***<br>[0.011,0.043]     |                                 | 0.031***<br>[0.013,0.049]    |
| Cognitive: Word Recall | -0.0039*<br>[-0.0072,-0.00073] | -0.0022<br>[-0.0054,0.0010]   | -0.0030***<br>[-0.0048,-0.0012] | -0.0019<br>[-0.0043,0.00056] |
| Observations           | 13718                          | 12376                         | 23491                           | 14941                        |
| R <sup>2</sup>         | 0.015                          | 0.027                         | 0.010                           | 0.014                        |

95% confidence intervals in brackets

\*  $p < 0.05$ , \*\*  $p < 0.01$ , \*\*\*  $p < 0.001$

The impact of job loss on depression score, ages 50-64, baseline employed, HRS and SHARE



Appendix 8- The impact of job loss on depression score, ages 50-64, HRS 2006-2010, 2008 Inclusive

|                           | HRS (I)<br>Depression Score | HRS (II)<br>Depression Score    | HRS (III)<br>Depression Score   |
|---------------------------|-----------------------------|---------------------------------|---------------------------------|
| Unemployed                | 0.049**<br>[0.020,0.079]    | 0.043**<br>[0.011,0.075]        | 0.32*<br>[0.043,0.60]           |
| Unemployed-Initial Wealth |                             |                                 | -0.025*<br>[-0.049, -0.00096]   |
| Retired                   | 0.00095<br>[-0.0087,0.011]  | -0.0013<br>[-0.012,0.0089]      | -0.0014<br>[-0.012,0.0089]      |
| Disabled                  | 0.077**<br>[0.030,0.12]     | 0.060*<br>[0.0043,0.12]         | 0.060*<br>[0.0049,0.12]         |
| Age                       | 0.0077<br>[-0.00029,0.016]  | 0.0058<br>[-0.0022,0.014]       | 0.0055<br>[-0.0024,0.014]       |
| Single                    | 0.04<br>[-0.024,0.10]       | 0.037<br>[-0.027,0.10]          | 0.038<br>[-0.026,0.10]          |
| Divorced or Widowed       | 0.057***<br>[0.035,0.078]   | 0.062***<br>[0.039,0.085]       | 0.062***<br>[0.039,0.085]       |
| Log Wealth                |                             | -0.0087***<br>[-0.013, -0.0045] | -0.0088***<br>[-0.013, -0.0046] |
| Pension                   |                             | -0.015*<br>[-0.029, -0.0016]    | -0.015*<br>[-0.029, -0.0015]    |
| Log Income                |                             | 0.0026<br>[-0.0024,0.0077]      | 0.0025<br>[-0.0025,0.0076]      |
| Currently Smokes          |                             | -0.0043<br>[-0.024,0.015]       | -0.0042<br>[-0.023,0.015]       |
| Drinking                  |                             | 0.009<br>[-0.014,0.032]         | 0.0092<br>[-0.013,0.032]        |
| IADL Score                |                             | 0.041***<br>[0.025,0.056]       | 0.040***<br>[0.025,0.056]       |
| ADL Score                 |                             | 0.037***<br>[0.023,0.050]       | 0.037***<br>[0.023,0.050]       |
| Observations              | 18339                       | 16488                           | 16488                           |
| R <sup>2</sup>            | 0.01                        | 0.027                           | 0.028                           |

95% confidence intervals in brackets

\*  $p < 0.05$ , \*\*  $p < 0.01$ , \*\*\*  $p < 0.001$

Appendix 9-Impact of Job loss on depression by European Region, ages 50-64, SHARE

|                     | Northern Europe<br>Depression Score | Western Europe<br>Depression Score | Southern Europe<br>Depression Score |
|---------------------|-------------------------------------|------------------------------------|-------------------------------------|
| Unemployed          | 0.012<br>[-0.046,0.069]             | 0.026<br>[-0.024,0.076]            | 0.028<br>[-0.032,0.087]             |
| Retired             | -0.0074<br>[-0.029,0.015]           | -0.0086<br>[-0.027,0.0098]         | 0.0084<br>[-0.024,0.041]            |
| Disabled            | 0.048<br>[-0.028,0.12]              | 0.078*<br>[0.018,0.14]             | 0.026<br>[-0.083,0.14]              |
| Age                 | -0.0090***<br>[-0.014, -0.0040]     | 0.011***<br>[0.0050,0.017]         | -0.0013<br>[-0.0042,0.0015]         |
| Single              | 0.11<br>[-0.11,0.33]                | 0.022<br>[-0.047,0.091]            | 0.22*<br>[0.042,0.40]               |
| Divorced or Widowed | 0.0093<br>[-0.041,0.059]            | 0.083**<br>[0.026,0.14]            | 0.025<br>[-0.088,0.14]              |
| Log Wealth          | -0.0068<br>[-0.016,0.0020]          | 0.00078<br>[-0.0056,0.0072]        | -0.00039<br>[-0.0099,0.0092]        |
| Pension             | 0.013<br>[-0.0072,0.033]            | -0.011<br>[-0.029,0.0070]          | -0.011<br>[-0.042,0.020]            |
| Log Income          | 0.0041<br>[-0.0070,0.015]           | -0.0024<br>[-0.0093,0.0044]        | 0.0048<br>[-0.0037,0.013]           |
| Currently Smokes    | -0.021<br>[-0.045,0.0036]           | -0.016<br>[-0.036,0.0033]          | 0.015<br>[-0.012,0.042]             |
| Drinking            | -0.0058<br>[-0.040,0.029]           | 0.011<br>[-0.0054,0.027]           | -0.0062<br>[-0.027,0.015]           |
| IADL Score          | -0.0021<br>[-0.035,0.031]           | 0.042<br>[-0.014,0.099]            | 0.08<br>[-0.029,0.19]               |
| ADL Score           | 0.026<br>[-0.0047,0.056]            | 0.032*<br>[0.0030,0.061]           | 0.035<br>[-0.0094,0.079]            |
| Observations        | 3517                                | 5648                               | 3387                                |
| R <sup>2</sup>      | 0.013                               | 0.026                              | 0.042                               |

95% confidence intervals in brackets

\*  $p < 0.05$ , \*\*  $p < 0.01$ , \*\*\*  $p < 0.001$
